# Supplementary material for: Resistance Training Improves Sleep and Anti-Inflammatory Parameters in Sarcopenic Older Adults: A Randomized Controlled Trial
Source: MDPI journal article supplement (doi:10.3390/ijerph192316322), 2022-12-06
Supplement: s1 [file s1]

**Supplementary Table S1.** Sample characterization at baseline subgroup analysis by gender

| <i>Variables/Groups</i>                                 | <b>CTL-male</b><br>n=3 | <b>CTL-female</b><br>n=11 | <b>RET-male</b><br>n=7 | <b>RET-female</b><br>n=7 |
|---------------------------------------------------------|------------------------|---------------------------|------------------------|--------------------------|
| <i>Age</i> (years)                                      | 79.33 ± 3.51           | 73.36 ± 7.43              | 75.57 ± 6.13           | 79.28 ± 6.26             |
| <i>Height</i> (cm)                                      | 164.00 ± 17.77         | 153.84 ± 9.10             | 172.82 ± 6.55          | 151.25 ± 6.45            |
| <i>Body Mass</i> (kg)                                   | 86.63 ± 9.8#           | 60.59 ± 10.8              | 77.55 ± 7.49#          | 57.71 ± 8.2              |
| <i>Body Fat</i> (%)                                     | 36.86 ± 11.60          | 43.67 ± 4.56              | 28.58 ± 6.67           | 42.65 ± 7.71             |
| <i>AMI</i> (kg/m <sup>2</sup> )                         | 6.92 ± 0.06            | 5.76 ± 0.60               | 6.36 ± 2.32            | 5.67 ± 0.31              |
| <i>Body Mass Index</i> (kg/m <sup>2</sup> )             | 32.57 ± 5.02*          | 25.45 ± 2.72              | 25.97 ± 2.22           | 25.10 ± 1.92             |
| <b>Hemoglobin</b> (g/dl)                                | 14.33 ± 2.20           | 13.60 ± 1.27              | 15.34 ± 0.65           | 13.81 ± 1.03             |
| <b>Hematocrit</b> (%)                                   | 42.16 ± 7.33           | 40.65 ± 3.32              | 45.82 ± 2.16           | 42.06 ± 3.87             |
| <b>Platelets</b> (thousands/mm <sup>3</sup> )           | 194.00 ± 43.13         | 189.50 ± 7.77             | 197.00 ± 52.85         | 253.83 ± 60.91           |
| <b>Leukocytes</b> (thousands/mm <sup>3</sup> )          | 5.30 ± 1.05            | 4.92 ± 1.01               | 7.35 ± 2.20            | 5.71 ± 1.01              |
| <b>Neutrophils</b> (thousands/mm <sup>3</sup> )         | 3.19 ± 0.45            | 3.07 ± 1.01               | 4.51 ± 1.71            | 3.28 ± 0.96              |
| <b>Eosinophils</b> (thousands/mm <sup>3</sup> )         | 0.11 ± 0.08            | 0.04 ± 0.05               | 0.41 ± 0.62            | 0.12 ± 0.08              |
| <b>Basophils</b> (thousands/mm <sup>3</sup> )           | 0.05 ± 0.01            | 0.01 ± 0.00               | 0.02 ± 0.01            | 0.04 ± 0.02              |
| <b>Typical lymphocytes</b> (thousands/mm <sup>3</sup> ) | 1.60 ± 0.61            | 1.51 ± 0.02               | 1.86 ± 0.80            | 1.93 ± 0.46              |
| <b>Total lymphocytes</b> (thousands/mm <sup>3</sup> )   | 1.60 ± 0.61            | 1.51 ± 0.02               | 1.86 ± 0.80            | 1.93 ± 0.46              |
| <b>Monocytes</b> (thousands/mm <sup>3</sup> )           | 0.32 ± 0.06            | 0.28 ± 0.07               | 0.53 ± 0.23            | 0.34 ± 0.07              |
| <b>Cholesterol</b> (mg/dl)                              | 153.33 ± 20.03         | 199.50 ± 0.71             | 159.60 ± 14/57         | 210.00 ± 45.21           |
| <b>HDL</b> (mg/dl)                                      | 51.00 ± 4.58           | 82.00 ± 11.31             | 48.60 ± 10.99          | 59.66 ± 8.43             |
| <b>NO HDL</b> (mg/dl)                                   | 102.93 ± 16.19         | 117.50 ± 10.60            | 111.00 ± 18.08         | 150.33 ± 47.71           |
| <b>LDL</b> (mg/dl)                                      | 78.66 ± 16.77          | 102.50 ± 14.84            | 89.60 ± 11.61          | 126.50 ± 42.30           |
| <b>VLDL</b> (mg/dl)                                     | 23.66 ± 2.08           | 15.00 ± 4.24              | 21.40 ± 10.16          | 23.83 ± 6.61             |
| <b>Triglycerides</b> (mg/dl)                            | 119.00 ± 11.78         | 74.50 ± 20.50             | 106.00 ± 51.26         | 121.16 ± 32.40           |
| <b>Glucose</b> (mg/dl)                                  | 103.33 ± 5.13          | 94.00 ± 4.24              | 96.20 ± 17.54          | 93.33 ± 6.77             |
| <b>Urea</b> (mg/dl)                                     | 31.33 ± 2.08           | 33.50 ± 4.90              | 39.80 ± 9.25           | 41.83 ± 14.52            |
| <b>Creatinine</b> (mg/dl)                               | 0.90 ± 0.00            | 0.74 ± 0.03               | 0.94 ± 0.10            | 0.75 ± 0.20              |
| <b>Albumin</b> (g/dl)                                   | 4.30 ± 0.26            | 4.40 ± 0.28               | 4.38 ± 0.30            | 4.13 ± 0.25              |

Statistical Analysis by Generalized Linear Model (GLM - data presented as mean ± standard de-viation) with Duncan's post hoc. CTL = Control group, RET = Resistance Exercise Training group. AMI = appendicular body mass index. g/m<sup>2</sup>= gram/square meter. Kg = kilogram/square meter. g/dL. = gram/deciliter. thousand/mm<sup>3</sup>= thousand units/cubic millimeter. mg/dL = milli-gram/deciliter. % = percentage. \* different to everyone else. # male different to female p < 0.05.

**Supplementary Table S2.** - Evaluation of sarcopenia parameters and strength subgroup analysis by gender.

| <i>Variables/Groups</i>            | <b>CTL</b>     |                |                |                | <b>RET</b>     |                |                |                |
|------------------------------------|----------------|----------------|----------------|----------------|----------------|----------------|----------------|----------------|
|                                    | Male n=3       |                | Female n=11    |                | Male n=7       |                | Female n=7     |                |
|                                    | Baseline       | After 12 weeks |
| <b>Handgrip</b> (Kg)               | 27.66 ± 4.93   | 22.66 ± 7.02   | 18.82 ± 6.65   | 20.06 ± 3.65   | 26.41 ± 5.10   | 34.14 ± 6.10*  | 16.57 ± 2.50   | 26.77 ± 10.11* |
| <b>SPPB</b> (score)                | 10.00 ± 1.73   | 10.33 ± 2.08   | 8.63 ± 2.73    | 10.36 ± 2.20   | 10.00 ± 1.15   | 11.57 ± 0.78   | 10.00 ± 1.82   | 11.28 ± 1.11   |
| <b>AMI</b> (kg/m <sup>2</sup> )    | 7.13 ± 0.44    | 6.93 ± 0.07    | 6.28 ± 0.73    | 5.75 ± 0.63    | 7.51 ± 0.48    | 6.36 ± 2.32    | 5.85 ± 0.57    | 6.67 ± 0.31    |
| <b>PT ext. Absolute</b> (N-M)      | 69.43 ± 29.21  | 73.66 ± 25.12  | 63.63 ± 38.72  | 70.43 ± 39.15  | 80.77 ± 28.37  | 79.90 ± 27.11  | 104.12 ± 28.27 | 108.25 ± 38.76 |
| <b>PT ext. BMR</b> (%)             | 109.53 ± 29.68 | 110.73 ± 28.06 | 99.54 ± 39.98  | 104.11 ± 46.57 | 127.12 ± 38.21 | 127.48 ± 36.20 | 154.62 ± 38.64 | 155.50 ± 35.02 |
| <b>PT flex. Absolute</b> (N-M)     | 36.13 ± 4.63   | 42.13 ± 11.67  | 30.73 ± 21.48  | 41.10 ± 31.28  | 37.90 ± 12.40  | 41.94 ± 12.35  | 45.84 ± 15.52  | 48.82 ± 14.38  |
| <b>PT flex. BMR</b> (%)            | 56.73 ± 16.91  | 66.63 ± 7.45   | 49.50 ± 24.52  | 60.89 ± 38.25  | 61.31 ± 17.80  | 66.31 ± 16.64  | 69.61 ± 14.10  | 72.15 ± 16.26  |
| <b>PT isometric Absolute</b> (N-M) | 111.10 ± 38.52 | 108.40 ± 51.02 | 72.68 ± 32.44  | 74.70 ± 35.03  | 97.05 ± 28.92  | 82.17 ± 19.55  | 118.22 ± 55.23 | 118.22 ± 64.81 |
| <b>PT isometric BMR</b> (%)        | 161.73 ± 46.38 | 161.13 ± 49.55 | 102.52 ± 36.79 | 114.79 ± 45.92 | 124.22 ± 58.82 | 104.04 ± 49.51 | 154.50 ± 58.91 | 167.20 ± 51.85 |

Statistical Analysis by Generalized Linear Model (GLM - data presented as mean ± standard deviation) with Duncan's post hoc. CTL = Control group, RET = Resistance Exercise Training group. AMI = appendicular body mass index. kg/m<sup>2</sup>= kilogram/square meter. N-M = newton meter. % = percentage. PT= Peak Torque. Ext. = knee extension. Flex = knee flexion. BMR = body mass relative. \* Different to baseline and CTL by gender p < 0.05.

**Supplementary Table S3.** - Evaluation of sleep aspects through full-night polysomnography subgroup analysis by gender.

| <i>Variables/Groups</i>                 | CTL             |                |                |                | RET            |                |                |                 |
|-----------------------------------------|-----------------|----------------|----------------|----------------|----------------|----------------|----------------|-----------------|
|                                         | Male n=3        |                | Female n=11    |                | Male n=7       |                | Female n=7     |                 |
|                                         | Baseline        | After 12 weeks | Baseline       | After 12 Weeks | Baseline       | After 12 weeks | Baseline       | After 12 weeks  |
| <b>Sleep Latency</b> ( <i>min</i> )     | 24.7 ± 16.52    | 26.70 ± 20.95  | 20.74 ± 16.16  | 30.88 ± 23.88  | 19.48 ± 13.32  | 10.05 ± 5.59   | 32.24 ± 24.66  | 22.12 ± 19.62   |
| <b>REM sleep latency</b> ( <i>min</i> ) | 110.50 ± 15.75  | 95.83 ± 31.86  | 79.59 ± 47.76  | 104.95 ± 49.59 | 101.85 ± 79.13 | 133.64 ± 68.98 | 115.21 ± 72.35 | 100.57 ± 74.06  |
| <b>Total Sleep Time</b> ( <i>min</i> )  | 318.56 ± 123.90 | 326.66 ± 95.21 | 348.39 ± 85.19 | 324.72 ± 62.81 | 296.10 ± 49.27 | 285.47 ± 36.87 | 323.91 ± 71.32 | 312.25 ± 117.69 |
| <b>Sleep Efficiency</b> (%)             | 66.68 ± 16.26   | 71.53 ± 12.58  | 73.81 ± 17.65  | 68.93 ± 93     | 63.98 ± 11.22  | 64.71 ± 14.42  | 70.12 ± 15.76  | 71.14 ± 25.31   |
| <b>N1</b> (%)                           | 11.63 ± 2.50    | 11.70 ± 6.14   | 9.90 ± 4.81    | 9.83 ± 3.30    | 27.94 ± 18.54  | 27.30 ± 21.07  | 13.31 ± 8.47   | 17.32 ± 22.02   |
| <b>N2</b> (%)                           | 33.34 ± 6.09    | 37.00 ± 4.47   | 41.16 ± 12.66  | 44.12 ± 11.45  | 30.32 ± 10.29  | 33.24 ± 10.03  | 43.90 ± 9.80   | 41.51 ± 4.67    |
| <b>N3</b> (%)                           | 33.53 ± 6.24    | 28.16 ± 3.23   | 31.81 ± 12.87  | 27.70 ± 10.25  | 22.51 ± 9.77   | 28.38 ± 12.09  | 28.60 ± 9.52   | 32.12 ± 10.91   |
| <b>WASO</b> ( <i>min</i> )              | 73.40 ± 56.42   | 88.95 ± 34.43  | 81.45 ± 47.65  | 100.40 ± 43.06 | 149.07 ± 51.44 | 154.34 ± 73.12 | 107.77 ± 60.84 | 108.07 ± 113.74 |
| <b>Apnea/hour</b> ( <i>n°/h</i> )       | 11.56 ± 5.89    | 14.46 ± 2.53   | 9.17 ± 4.27    | 12.97 ± 8.62   | 23.62 ± 17.08  | 11.88 ± 7.51*  | 10.02 ± 5.66   | 2.87 ± 4.44*    |
| <b>AHI</b> ( <i>n°/h</i> )              | 30.20 ± 5.23    | 28.16 ± 9.68   | 11.10 ± 11.46  | 11.58 ± 15.65  | 15.01 ± 20.32  | 12.05 ± 18.74  | 13.15 ± 10.56  | 6.68 ± 6.23#    |
| <b>SPO2</b> (%)                         | 13.43 ± 8.05    | 10.36 ± 8.69   | 5.27 ± 10.92   | 5.51 ± 11.73   | 8.70 ± 13.73   | 7.14 ± 11.65   | 4.98 ± 5.72    | 2.85 ± 4.07     |
| <b>Epworth</b> ( <i>score</i> )         | 4.33 ± 3.21     | 6.66 ± 4.72    | 5.45 ± 3.17    | 5.27 ± 3.31    | 8.14 ± 4.63    | 10.28 ± 4.27   | 5.42 ± 3.35    | 2.71 ± 2.56     |
| <b>IGI</b> ( <i>score</i> )             | 5.66 ± 5.50     | 4.00 ± 3.60    | 5.72 ± 3.69    | 6.27 ± 3.84    | 8.28 ± 5.18    | 4.85 ± 4.94    | 9.14 ± 3.76    | 5.42 ± 2.37     |
| <b>PSQI</b> ( <i>score</i> )            | 6.00 ± 4.58     | 5.33 ± 5.77    | 5.18 ± 3.31    | 6.09 ± 3.44    | 6.85 ± 3.28    | 5.14 ± 3.07    | 7.28 ± 4.75    | 4.42 ± 3.25     |
| <b>PSQI Sleep Efficiency</b> (%)        | 85.66 ± 14.01   | 91.00 ± 8.54   | 84.18 ± 11.32  | 80.71 ± 11.18  | 76.57 ± 11.04  | 83.42 ± 13.19  | 74.57 ± 19.69  | 83.71 ± 16.91   |

Statistical Analysis by Generalized Linear Model (GLM–data presented as mean ± standard deviation) with Duncan’s post hoc. CTL = Control group, RET = Resistance Exercise Training group. AHI = apnea and hypopnea index. min. = minutes. % = percentage. n° = number of events. n°/h = number of events per hour. IGI = Index Gravity Insomnia. PSQI = Pittsburgh Sleep Quality Index. \* different from baseline for the same sex p < 0.05. # different from men in the CTL at baseline p < 0.05.

**Supplementary Table S4.** Evaluation of biochemical markers subgroup analysis by gender.

| Variables/Groups            | CTL           |                          |               |                | RET             |                          |               |                           |
|-----------------------------|---------------|--------------------------|---------------|----------------|-----------------|--------------------------|---------------|---------------------------|
|                             | Male n=3      |                          | Female n=11   |                | Male n=7        |                          | Female n=7    |                           |
|                             | Baseline      | After 12 weeks           | Baseline      | After 12 Weeks | Baseline        | After 12 weeks           | Baseline      | After 12 weeks            |
| <b>Testosterone</b> (ng/dL) | 551 ± 76.50*  | 585.45 ± 73.61*          | 32.70 ± 14.32 | 29.58 ± 15.03  | 588.68 ± 86.01* | 579.62 ± 185.0*          | 26.08 ± 13.10 | 21.80 ± 15.03             |
| <b>GH</b> (ng/mL)           | 0.36 ± 0.23   | 0.44 ± 0.36              | 2.39 ± 2.58   | 1.29 ± 1.44    | 0.69 ± 0.71     | 1.02 ± 1.09              | 1.83 ± 1.45   | 1.63 ± 1.36               |
| <b>IGF 1</b> (ng/mL)        | 27.15 ± 43.53 | 28.38 ± 42.97            | 8.21 ± 23.89  | 10.84 ± 24.41  | 2.23 ± 2.99     | 2.27 ± 3.44              | 13.30 ± 28.76 | 12.39 ± 28.90             |
| <b>Cortisol</b> (ug/dL)     | 11.86 ± 1.80  | 14.30 ± 0.79             | 12.40 ± 3.40  | 12.78 ± 2.25   | 9.10 ± 4.30#    | 11.58 ± 2.65             | 11.00 ± 1,45  | 11.00 ± 2,83              |
| <b>TNF-α</b> (pg/mL)        | 4.75 ± 0.36   | 4,59 ± 0.28              | 4.18 ± 0.26   | 4.05 ± 0.24    | 4.47 ± 0.19     | 4.28 ± 0.22 <sup>+</sup> | 4.33 ± 0.41   | 4.54 ± 0.34 <sup>++</sup> |
| <b>IL-6</b> (pg/mL)         | 2.71 ± 0.68   | 3.50 ± 0.33              | 2.92 ± 0.80   | 2.30 ± 0.41    | 2.76 ± 1.25     | 3.15 ± 0.96              | 3.09 ± 0.95   | 3.44 ± 2.32               |
| <b>IL-10</b> (pg/mL)        | 2.28 ± 0.82   | 3.28 ± 0.89 <sup>^</sup> | 1.88 ± 0.52   | 1.98 ± 0.68    | 2.11 ± 0.63     | 2.30 ± 0.84              | 2.14 ± 1.00   | 2.72 ± 1.14               |
| <b>IL-1 RA</b> (ng/mL)      | 1.01 ± 0.09   | 0.98 ± 0.04              | 0.93 ± 0.05   | 0.93 ± 0.05    | 0.94 ± 0.04     | 1.01 ± 0.14‡             | 0.92 ± 0.03   | 0.97 ± 0.05               |

Statistical Analysis by Generalized Linear Model (GLM - data presented as mean ± standard deviation) with Duncan’s *post hoc*. CTL = Control group, RET = Resistance Exercise Training group. ng/dL. = nanogram/deciliter. ug/dL. = microgram/deciliter. pg/dL = picogram/deciliter. % = percentage. \*different to female at same timepoint; p< 0.05. # different to CTL-male at 12weeks; p< 0.05. <sup>+</sup> different to CTL-male at same time-point; p< 0.05. <sup>++</sup> different to CTL-female at same time-point; p< 0.05. <sup>^</sup>different to all; p< 0.05. <sup>‡</sup> different to RET-male at baseline.

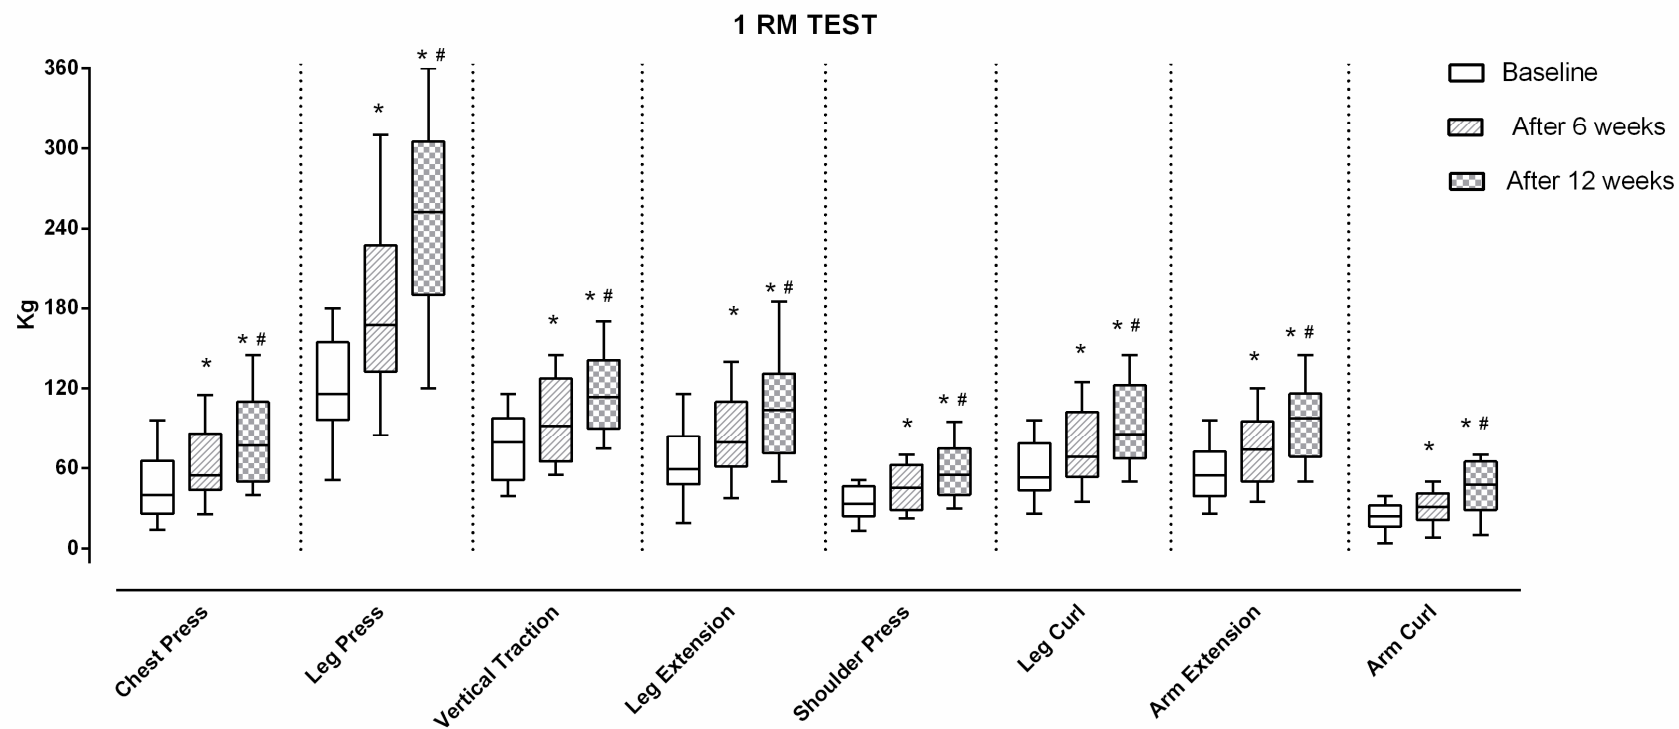

**Figure S1:** STRENGTH assessment by the test of 1 repetition maximum (1RM). The results are presented by the BoxPlot represented by the average, maximum and minimum values. \* difference to baseline; # difference for 6th training week;  $p < 0.01$
